# Supplementary material
Source: HighWire-hosted journal article supplement (https://jnm.snmjournals.org/highwire/filestream/93989/field_highwire_adjunct_files/0/jnm059360_Supplemental_Table_1.pdf)
Supplement: jnm059360_Supplemental_Table_1.pdf [file jnm059360_Supplemental_Table_1.pdf]

**SUPPLEMENTAL TABLE 1.** The effect of cyclosporine A (CsA) on [<sup>11</sup>C]-radioactivity in the plasma present as verapamil or its metabolites. \*, *P*<0.05.

|            |            | 9 Minutes  |             |                   |            |             |                   |
|------------|------------|------------|-------------|-------------------|------------|-------------|-------------------|
| Subject    | CsA dose   | Before CsA |             |                   | During CsA |             |                   |
| Identifier | (mg/kg/hr) | Verapamil  | D-617/D-717 | Polar metabolites | Verapamil  | D-617/D-717 | Polar metabolites |
| 02088      | 12         | 33         | 30          | 37                | 41         | 37          | 22                |
| 02054      | 12         | 47         | 24          | 29                | 28         | 51          | 21                |
| 04052      | 24         | 59         | 17          | 24                | 61         | 23          | 16                |
| 02091      | 24         | 55         | 15          | 30                | 48         | 34          | 19                |
| Mean       |            | 48         | 21          | 30                | 44         | 36          | 20*               |
| SD         |            | 12         | 7           | 5                 | 13         | 11          | 3                 |

|            |            | 20 Minutes |             |                   |            |             |                   |
|------------|------------|------------|-------------|-------------------|------------|-------------|-------------------|
| Subject    | CsA dose   | Before CsA |             |                   | During CsA |             |                   |
| Identifier | (mg/kg/hr) | Verapamil  | D-617/D-717 | Polar metabolites | Verapamil  | D-617/D-717 | Polar metabolites |
| 02088      | 12         | 21         | 41          | 38                | 14         | 59          | 27                |
| 02054      | 12         | 25         | 38          | 36                | 17         | 62          | 21                |
| 04052      | 24         | 34         | 33          | 33                | 32         | 39          | 28                |
| 02091      | 24         | 32         | 29          | 39                | 23         | 52          | 24                |
| Mean       |            | 28         | 35          | 37                | 21.8       | 53          | 25*               |
| SD         |            | 6          | 5           | 3                 | 8.1        | 10          | 3                 |

|            |            | 40 Minutes |             |                   |            |             |                   |
|------------|------------|------------|-------------|-------------------|------------|-------------|-------------------|
| Subject    | CsA dose   | Before CsA |             |                   | During CsA |             |                   |
| Identifier | (mg/kg/hr) | Verapamil  | D-617/D-717 | Polar metabolites | Verapamil  | D-617/D-717 | Polar metabolites |
| 02088      | 12         | 10         | 51          | 40                | 9          | 66          | 25                |
| 02054      | 12         | 17         | 44          | 39                | 11         | 65          | 24                |
| 04052      | 24         | 21         | 44          | 35                | 17         | 41          | 42                |
| 02091      | 24         | 15         | 61          | 24                | 13         | 63          | 24                |
| Mean       |            | 16         | 50          | 34                | 13         | 59          | 29                |
| SD         |            | 5          | 8           | 7                 | 4          | 12          | 8                 |

**SUPPLEMENTAL TABLE 2.** The effect of cyclosporine A (CsA) on plasma and tissue [<sup>11</sup>C]-radioactivity. Data are expressed as mean ± SD (n=4) and were analyzed by Mann-Whitney-test. High variability in spinal and uterine wall radioactivity concentrations at early time points prevented accurate determination of t<sub>max</sub> and C<sub>max</sub> of this tissue. \*, P<0.05.

| <b>ID-normalized AUC<sub>(0-9)</sub> (min/L)</b> |                     |                     |                 |
|--------------------------------------------------|---------------------|---------------------|-----------------|
| <b>Tissue</b>                                    | <b>Before CsA</b>   | <b>During CsA</b>   | <b>% Change</b> |
| Brain                                            | 1.02 ± 0.16         | 3.45 ± 0.69         | 238 ± 49*       |
| Fetal liver                                      | 1.02 ± 0.28         | 1.97 ± 0.57         | 108 ± 90*       |
| Maternal liver                                   | 6.03 ± 0.87         | 4.92 ± 1.00         | -19 ± 7         |
| <b>Gallbladder</b>                               | <b>13.69 ± 3.97</b> | <b>14.21 ± 4.24</b> | <b>6 ± 27</b>   |
| Kidneys                                          | 7.13 ± 1.29         | 7.70 ± 1.26         | 9 ± 12          |
| Heart                                            | 4.82 ± 1.12         | 4.98 ± 0.71         | 5 ± 13          |
| Lungs                                            | 3.30 ± 1.03         | 3.49 ± 0.84         | 8 ± 9           |
| <b>Vertebrae</b>                                 | <b>5.37 ± 2.08</b>  | <b>4.75 ± 1.44</b>  | <b>-7 ± 16</b>  |
| Spleen                                           | 6.82 ± 1.43         | 7.30 ± 1.86         | 2 ± 2           |
| <b>Uterine wall</b>                              | <b>2.55 ± 1.16</b>  | <b>2.49 ± 0.75</b>  | <b>7 ± 22</b>   |
| Placenta                                         | 1.07 ± 0.28         | 1.27 ± 0.24         | 20 ± 9          |
| Plasma                                           | 1.10 ± 0.08         | 0.99 ± 0.12         | -8 ± 14         |

  

| <b>Tmax (min)</b>  |                      |                      |                 |
|--------------------|----------------------|----------------------|-----------------|
| <b>Tissue</b>      | <b>Before CsA</b>    | <b>During CsA</b>    | <b>% change</b> |
| Brain              | 1.01 ± 0.45          | 8.25 ± 2.06          | 833 ± 410*      |
| Fetal liver        | 9.50 ± 2.94          | 9.50 ± 3.65          | 0 ± 25          |
| Maternal liver     | 10.50 ± 2.16         | 8.75 ± 3.20          | -18 ± 15        |
| <b>Gallbladder</b> | <b>35.50 ± 14.00</b> | <b>27.75 ± 14.86</b> | <b>-22 ± 36</b> |
| Kidneys            | 1.42 ± 0.64          | 1.59 ± 0.56          | 20 ± 28         |
| Heart              | 0.80 ± 0.41          | 1.03 ± 0.43          | 38 ± 25         |
| Lungs              | 0.76 ± 0.38          | 1.05 ± 0.44          | 45 ± 23         |
| Spleen             | 1.63 ± 0.48          | 1.79 ± 0.70          | 9 ± 19          |
| Placenta           | 1.54 ± 0.42          | 4.54 ± 2.76          | 214 ± 186       |
| Plasma             | 0.86 ± 0.29          | 0.90 ± 0.27          | 6 ± 18          |

  

| <b>ID-normalized Cmax (L<sup>-1</sup>)</b> |                     |                    |                 |
|--------------------------------------------|---------------------|--------------------|-----------------|
| <b>Tissue</b>                              | <b>Before CsA</b>   | <b>During CsA</b>  | <b>% change</b> |
| Brain                                      | 0.14 ± 0.02         | 0.45 ± 0.10        | 209 ± 42*       |
| Fetal liver                                | 0.18 ± 0.07         | 0.35 ± 0.08        | 106 ± 72        |
| Maternal liver                             | 0.88 ± 0.10         | 0.71 ± 0.10        | -19 ± 3         |
| <b>Gallbladder</b>                         | <b>14.64 ± 9.18</b> | <b>3.07 ± 1.25</b> | <b>-61 ± 42</b> |
| Kidneys                                    | 1.26 ± 0.14         | 1.46 ± 0.16        | 16 ± 18         |
| Heart                                      | 0.86 ± 0.08         | 0.87 ± 0.07        | 3 ± 13          |
| Lungs                                      | 0.84 ± 0.22         | 0.88 ± 0.15        | 8 ± 15          |
| Spleen                                     | 1.14 ± 0.27         | 1.17 ± 0.39        | -2 ± 7          |
| Placenta                                   | 0.18 ± 0.07         | 0.18 ± 0.03        | 8 ± 21          |
| Plasma                                     | 0.73 ± 0.27         | 0.61 ± 0.22        | -9 ± 46         |
